# Supplementary material for: Xyloketal B Exhibits Its Antioxidant Activity through Induction of HO-1 in Vascular Endothelial Cells and Zebrafish
Source: MDPI journal article supplement (doi:10.3390/md11020504), 2013-02-18
Supplement: s1 [file s1]

marinedrugs-11-00504-s001.mol
  corina  05201405193D 1   1.00000     0.00000 
CORINA 3.49 0023  12.04.2013
 25 29  0  0  0  0  0  0  0  0999 V2000
    1.8950    2.5074   -2.7045 C   0  0  0  0  0  0  0  0  0  0  0  0
    1.2339    1.3418   -2.3380 C   0  0  0  0  0  0  0  0  0  0  0  0
    1.9514    0.2788   -1.8179 C   0  0  0  0  0  0  0  0  0  0  0  0
    3.3297    0.3843   -1.6474 C   0  0  0  0  0  0  0  0  0  0  0  0
    3.9875    1.5444   -2.0167 C   0  0  0  0  0  0  0  0  0  0  0  0
    3.2663    2.6087   -2.5440 C   0  0  0  0  0  0  0  0  0  0  0  0
   -0.2723    1.2853   -2.5085 C   0  0  0  0  0  0  0  0  0  0  0  0
   -0.7800    0.1437   -1.6378 C   0  0  0  0  0  0  0  0  0  0  0  0
    0.0702   -1.1017   -2.0308 C   0  0  0  0  0  0  0  0  0  0  0  0
    1.3551   -0.9052   -1.4699 O   0  0  0  0  0  0  0  0  0  0  0  0
    4.0658   -0.7944   -1.0389 C   0  0  0  0  0  0  0  0  0  0  0  0
    5.4139   -0.2807   -0.5513 C   0  0  0  0  0  0  0  0  0  0  0  0
    6.0499    0.4643   -1.7632 C   0  0  0  0  0  0  0  0  0  0  0  0
    5.3457    1.6849   -1.8995 O   0  0  0  0  0  0  0  0  0  0  0  0
    6.4583   -1.3792   -0.3085 C   0  0  0  0  0  0  0  0  0  0  0  0
    7.7631   -0.7616   -0.8702 C   0  0  0  0  0  0  0  0  0  0  0  0
    7.4242    0.5451   -1.3944 O   0  0  0  0  0  0  0  0  0  0  0  0
   -2.1902   -0.3451   -1.9959 C   0  0  0  0  0  0  0  0  0  0  0  0
   -2.0745   -1.8852   -1.8785 C   0  0  0  0  0  0  0  0  0  0  0  0
   -0.7040   -2.1828   -1.5177 O   0  0  0  0  0  0  0  0  0  0  0  0
    5.8893   -0.3738   -3.0331 C   0  0  0  0  0  0  0  0  0  0  0  0
    6.0907   -2.6519   -1.0740 C   0  0  0  0  0  0  0  0  0  0  0  0
    1.1948    3.5483   -3.2270 O   0  0  0  0  0  0  0  0  0  0  0  0
    0.1768   -1.2006   -3.5539 C   0  0  0  0  0  0  0  0  0  0  0  0
   -2.5553    0.0612   -3.4251 C   0  0  0  0  0  0  0  0  0  0  0  0
  1  2  2  0      
  2  3  1  0      
  3  4  2  0      
  4  5  1  0      
  5  6  2  0      
  6  1  1  0      
  2  7  1  0      
  7  8  1  0      
  8  9  1  0      
  9 10  1  0      
 10  3  1  0      
  4 11  1  0      
 11 12  1  0      
 12 13  1  0      
 13 14  1  0      
 14  5  1  0      
 12 15  1  0      
 15 16  1  0      
 16 17  1  0      
 17 13  1  0      
  8 18  1  0      
 18 19  1  0      
 19 20  1  0      
 20  9  1  0      
 13 21  1  0      
 15 22  1  0      
  1 23  1  0      
  9 24  1  0      
 18 25  1  0      
M  END
$$$$
