# Supplementary material for: Xyloketal B Exhibits Its Antioxidant Activity through Induction of HO-1 in Vascular Endothelial Cells and Zebrafish
Source: MDPI journal article supplement (doi:10.3390/md11020504), 2013-02-18
Supplement: s2 [file s2]

marinedrugs-11-00504-s001.mol
  ChemDraw04241410172D

 25 29  0  0  0  0  0  0  0  0999 V2000
   -1.0015    1.2716    0.0000 C   0  0  0  0  0  0  0  0  0  0  0  0
   -1.0015    0.4466    0.0000 C   0  0  0  0  0  0  0  0  0  0  0  0
   -0.2870    0.0341    0.0000 C   0  0  0  0  0  0  0  0  0  0  0  0
    0.4275    0.4466    0.0000 C   0  0  0  0  0  0  0  0  0  0  0  0
    0.4275    1.2716    0.0000 C   0  0  0  0  0  0  0  0  0  0  0  0
   -0.2870    1.6841    0.0000 C   0  0  0  0  0  0  0  0  0  0  0  0
   -1.7160    0.0341    0.0000 C   0  0  0  0  0  0  0  0  0  0  0  0
   -1.7160   -0.7909    0.0000 C   0  0  0  0  0  0  0  0  0  0  0  0
   -1.0015   -1.2034    0.0000 C   0  0  0  0  0  0  0  0  0  0  0  0
   -0.2870   -0.7909    0.0000 O   0  0  0  0  0  0  0  0  0  0  0  0
    1.1419    0.0341    0.0000 C   0  0  0  0  0  0  0  0  0  0  0  0
    1.8564    0.4466    0.0000 C   0  0  0  0  0  0  0  0  0  0  0  0
    1.8564    1.2716    0.0000 C   0  0  0  0  0  0  0  0  0  0  0  0
    1.1419    1.6841    0.0000 O   0  0  0  0  0  0  0  0  0  0  0  0
    2.6410    0.1917    0.0000 C   0  0  0  0  0  0  0  0  0  0  0  0
    3.1259    0.8591    0.0000 C   0  0  0  0  0  0  0  0  0  0  0  0
    2.6410    1.5265    0.0000 O   0  0  0  0  0  0  0  0  0  0  0  0
   -2.3291   -1.3429    0.0000 C   0  0  0  0  0  0  0  0  0  0  0  0
   -1.9935   -2.0966    0.0000 C   0  0  0  0  0  0  0  0  0  0  0  0
   -1.1730   -2.0104    0.0000 O   0  0  0  0  0  0  0  0  0  0  0  0
    1.8564    2.0966    0.0000 C   0  0  0  0  0  0  0  0  0  0  0  0
    3.0535   -0.5228    0.0000 C   0  0  0  0  0  0  0  0  0  0  0  0
   -1.7160    1.6841    0.0000 O   0  0  0  0  0  0  0  0  0  0  0  0
   -0.2870   -1.6159    0.0000 C   0  0  0  0  0  0  0  0  0  0  0  0
   -3.1259   -1.1294    0.0000 C   0  0  0  0  0  0  0  0  0  0  0  0
  1  2  2  0      
  2  3  1  0      
  3  4  2  0      
  4  5  1  0      
  5  6  2  0      
  6  1  1  0      
  2  7  1  0      
  7  8  1  0      
  8  9  1  0      
  9 10  1  0      
 10  3  1  0      
  4 11  1  0      
 11 12  1  0      
 12 13  1  0      
 13 14  1  0      
 14  5  1  0      
 12 15  1  0      
 15 16  1  0      
 16 17  1  0      
 17 13  1  0      
  8 18  1  0      
 18 19  1  0      
 19 20  1  0      
 20  9  1  0      
 13 21  1  6      
 15 22  1  6      
  1 23  1  0      
  9 24  1  6      
 18 25  1  6      
M  END
